# Supplementary material for: Design and development of a prototype for specific naked-eye detection of blister and nerve agents
Source: Royal Society of Chemistry journal article supplement (doi:10.1039/d1ay00449b), 2021-01-01
Supplement: d1ay00449b1.pdf [file d1ay00449b1.pdf]

## Supporting information

### **Design and development of a prototype for specific naked-eye detection of blister and nerve agents**

Vinod Kumar\*

*Process and Technology Development Division, Defence Research and Development Establishment, Jhansi Road, Gwalior 474002, MP, India.*

*E-mail: vkpal77@yahoo.co.in.*

| <b>Contents</b>                                                  | <b>Page</b> |
|------------------------------------------------------------------|-------------|
| 1. Structures of chemical probes used in CW sensing methods..... | S2          |

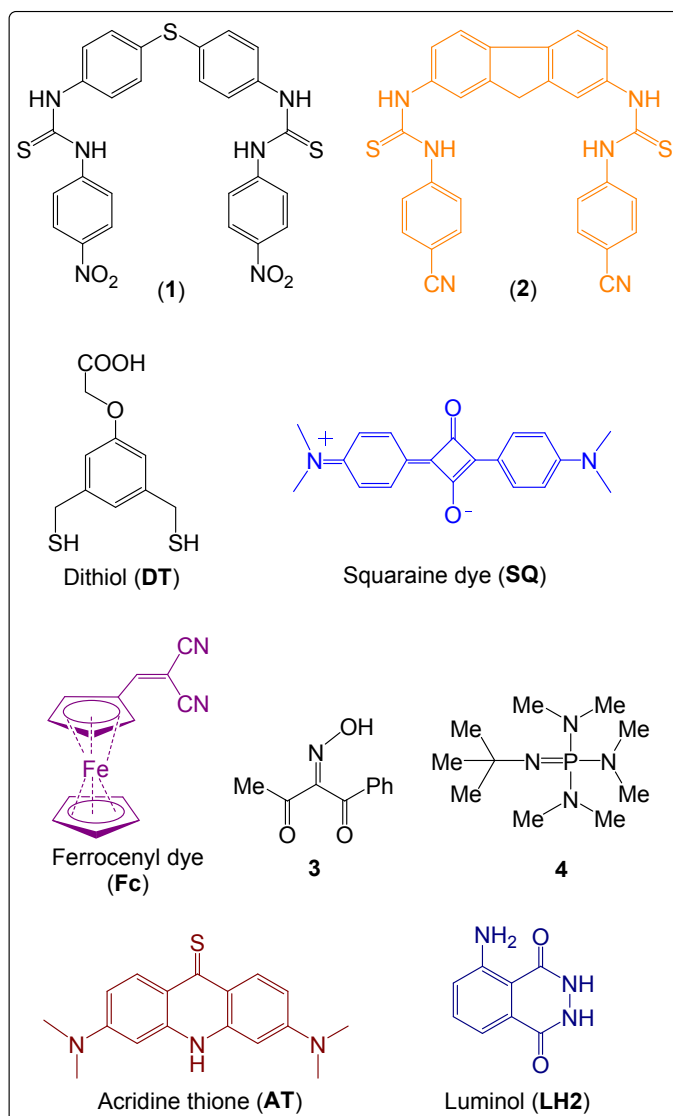

**Figure S1.** Chemical probes and reagents used in CW sensing methods.
